# Supplementary material for: Characterization of Sub-Regional Variation in Saccharomyces Populations and Grape Phenolic Composition in Pinot Noir Vineyards of a Canadian Wine Region
Source: Front Genet. 2020 Aug 31;11:908. doi: 10.3389/fgene.2020.00908 (PMC7489054; doi:10.3389/fgene.2020.00908)
Supplement: Supplementary file 2 [file Table_1.XLSX]

## Sheet: Table S1
mlgId	Use	C3		AT4		OO9		C5		C4		C8		O91		SCAAT3		YLR		SCY
Act7	Wine	109	109	291	291	408	408	146	166	253	253	146	146	295	295	397	397	123	123	323	323
AEBAP	Wine	115	115	293	297	446	449	122	137	253	262	139	153	283	283	403	403	126	126	291	291
AEBBlanc	Wine	115	115	289	293	422	425	122	124	253	310	139	146	268	307	388	400	126	126	279	311
AEBChard.D	Wine	115	121	276	289	422	434	124	132	310	310	139	146	268	316	483	483	126	126	305	311
AEBChard.M	Wine	115	115	289	293	422	425	122	124	253	310	139	146	268	307	388	400	126	126	279	311
AEBCK	Wine	115	121	276	289	422	434	124	132	307	310	139	146	268	316	388	483	126	126	305	305
AEBMED.A	Wine	121	121	287	293	446	446	122	189	244	244	143	143	301	304	385	385	126	126	279	279
AEBPC	Wine	121	121	275	275	449	449	122	122	256	256	150	150	274	274	380	380	126	126	279	279
AEBRouge	Wine	121	121	291	295	446	446	137	157	253	256	143	150	250	283	366	391	128	128	291	291
AEBSauv	Wine	121	121	291	295	446	446	137	157	253	256	143	143	250	283	366	391	128	128	291	291
AEBSuper16	Wine	121	121	291	291	446	446	137	159	253	256	143	150	250	283	366	391	128	128	291	291
AfB0213	Wine	121	121	295	295	446	446	120	166	259	362	139	153	304	304	403	406	114	126	344	344
AfDavis	Wine	115	121	291	293	446	455	120	159	253	253	139	153	271	271	385	409	126	126	344	344
AfF5	Wine	124	124	289	289	420	420	120	120	240	240	146	146	271	271	385	385	126	126	311	311
AfRMS2	Wine	115	121	281	289	434	446	122	124	253	262	139	146	268	295	385	388	109	126	279	311
AfRose	Wine	121	124	291	291	417	425	122	122	259	259	150	150	274	274	394	394	123	123	279	279
Ale514	Beer	112	118	271	289	391	402	122	187	259	304	130	133	236	265	380	380	109	109	279	364
AnAlc2	Wine	115	115	289	293	422	425	122	124	253	310	139	146	268	307	388	400	126	126	279	311
AnAlcC	Wine	115	115	289	293	422	425	122	124	253	310	139	146	268	307	388	400	126	126	279	311
AnAlcVIN7	Wine	115	115	276	291	434	434	168	180	250	310	139	159	268	271	388	422	123	126	305	320
AnExotic	Wine	115	115	293	293	425	425	122	122	253	253	139	139	217	307	400	400	126	126	311	311
AnNT1112	Wine	115	121	276	289	422	434	122	124	253	310	139	146	268	307	388	400	126	126	311	311
AnNT116.A	Wine	115	121	276	289	422	434	122	124	253	310	146	146	268	307	388	388	126	126	279	311
AnNT116.B	Wine	115	121	276	289	422	434	122	124	253	310	146	146	268	307	388	388	126	126	311	311
AnNT202	Wine	115	121	276	289	422	434	122	124	253	310	146	146	268	307	388	388	126	126	311	311
AnVIN13	Wine	115	115	289	293	422	425	122	124	253	310	139	146	268	307	388	400	126	126	279	311
AnVIN2000	Wine	115	121	276	289	422	434	132	132	310	310	139	146	268	316	391	483	126	126	305	311
AnVIN7	Wine	115	115	276	291	434	434	168	180	250	250	139	159	268	271	388	422	123	126	305	320
AWRI796	Wine	124	124	293	293	431	431	124	124	259	259	153	153	280	280	388	388	128	128	311	311
BCS103	Wine	121	121	295	295	446	446	120	166	259	362	139	153	304	304	403	406	114	126	344	344
BP725	Wine	121	124	297	297	449	449	132	132	253	253	139	139	280	280	380	416	123	123	294	294
CCCab	Wine	124	124	287	293	446	452	166	170	253	253	139	143	283	301	403	403	126	126	288	288
CCSauv	Wine	121	124	276	291	393	452	122	161	250	265	146	150	274	323	400	400	109	126	279	279
CHFerm	Wine	121	121	293	293	422	422	155	155	265	265	150	150	236	236	385	385	128	128	326	326
CY3079	Wine	121	124	291	293	446	446	122	166	253	262	139	146	274	292	382	400	126	126	279	279
Draught	Beer	112	118	271	289	391	402	122	187	259	304	130	133	236	265	380	380	109	109	279	364
EC1118	Wine	115	121	276	289	422	434	124	132	310	310	139	146	268	316	388	483	126	126	305	311
EfCSM	Wine	136	136	295	295	455	455	120	120	256	256	146	146	245	245	403	403	126	126	311	311
EfM1.D	Wine	124	155	271	271	402	417	122	130	253	262	130	130	233	262	422	422	103	123	294	314
EfM1.M	Wine	101	121	293	297	431	452	151	191	250	250	146	146	313	316	385	385	126	126	311	311
EfRP15.D	Wine	121	136	275	291	393	452	120	122	250	259	146	150	274	316	388	400	109	126	279	311
EfRP15.M	Wine	121	121	276	291	393	452	122	161	250	265	146	146	274	323	400	400	109	126	279	279
EfSimi	Wine	121	121	291	291	393	393	153	153	250	250	146	146	323	323	357	357	126	126	279	279
EfT306	Wine	121	121	291	291	452	452	176	176	256	256	143	143	259	259	385	385	126	126	279	279
Eleg	Wine	115	121	276	289	422	434	124	132	310	310	139	146	268	316	388	483	126	126	305	311
EnES488	Wine	109	109	304	304	402	417	143	153	259	304	143	153	289	289	391	391	126	126	296	296
ErFreddo	Wine	115	121	276	289	422	434	124	132	310	310	139	146	316	316	388	483	126	126	311	311
ErRouge	Wine	115	121	291	291	446	455	120	120	253	253	139	153	271	271	385	409	126	126	344	344
FChamp	Wine	115	115	276	276	434	449	174	174	294	294	139	143	271	271	388	388	126	126	308	308
FeRed	Wine	121	121	293	293	414	417	120	120	349	349	130	130	283	283	380	380	141	141	344	344
IOC182007	Wine	115	121	276	289	422	434	124	132	310	310	139	146	268	316	388	483	126	126	305	311
LafMB09	Wine	121	121	293	293	446	446	122	122	250	250	143	143	304	304	385	385	126	126	279	279
LafMB10	Wine	121	121	291	291	446	446	120	120	256	256	143	143	274	274	385	385	126	126	361	361
LafMH	Wine	124	124	276	276	446	446	120	120	240	240	146	146	274	274	385	385	126	126	323	323
Lag497	Beer	112	118	275	289	417	431	122	130	307	307	124	130	236	250	380	409	109	109	267	276
Lal58W3	Wine	121	121	289	289	452	452	148	148	268	268	153	153	298	298	400	400	123	123	344	344
Lal71B	Wine	124	124	271	293	402	446	120	157	262	349	139	139	268	280	385	422	126	126	279	279
LalAMH	Wine	121	121	291	291	434	446	139	141	262	262	139	146	268	277	385	385	123	123	320	320
LalBDX	Wine	121	124	297	297	449	449	132	132	253	253	139	139	280	280	380	416	123	123	294	294
LalBGY	Wine	127	127	279	279	452	452	139	139	256	256	146	146	295	295	403	403	126	126	279	279
LalBM45	Wine	124	124	289	289	446	446	120	120	262	262	153	153	280	280	385	385	109	109	323	323
LalBM4x4	Wine	124	124	291	293	402	417	122	153	259	259	150	153	326	326	400	400	123	123	279	279
LalBR97	Wine	121	121	287	293	446	446	122	122	247	250	143	143	301	301	385	385	126	126	279	279
LalC1108	Wine	124	124	293	293	431	431	124	124	259	259	139	153	280	280	388	388	128	128	311	311
LalClos	Wine	127	127	291	291	449	449	143	143	253	253	153	153	250	250	385	385	126	126	291	291
LalD21	Wine	121	121	287	293	446	446	122	191	244	244	143	143	301	301	385	385	126	126	279	279
LalD254	Wine	121	121	275	275	449	449	122	122	256	256	150	150	274	274	380	380	126	126	279	279
LalD80	Wine	118	121	275	295	437	437	139	184	253	271	146	146	245	245	400	441	123	123	279	279
LalDV10.A	Wine	115	124	276	289	422	434	124	132	310	310	146	146	268	316	388	483	126	126	305	311
LalDV10.B	Wine	115	124	276	289	422	434	124	132	310	310	146	146	268	316	388	483	126	126	311	311
LalGRE	Wine	136	136	291	291	455	455	180	180	256	256	146	146	274	274	403	403	109	109	311	311
LalL2TD	Wine	115	121	276	289	422	434	124	132	310	310	139	146	268	316	388	483	126	126	305	311
LalM	Wine	115	121	291	291	446	455	120	159	253	253	139	153	271	271	385	409	126	126	344	344
LalOpale	Wine	124	124	291	293	417	425	122	153	259	259	150	153	326	326	400	400	123	123	279	279
LalQA23	Wine	115	121	276	289	422	434	124	132	310	310	139	146	268	316	388	483	126	126	305	311
LalR2	Wine	121	124	287	293	446	452	166	170	253	259	139	143	283	301	397	403	126	126	279	288
LalR2056	Wine	121	124	276	291	393	452	122	161	250	265	146	150	274	323	400	400	109	126	279	279
LalR2226	Wine	115	121	289	291	446	449	161	174	250	268	143	153	253	271	385	403	126	126	386	386
LalR4600	Wine	115	121	276	289	422	434	124	132	310	310	139	146	268	316	388	483	126	126	305	311
LalRA17	Wine	115	121	293	293	446	452	122	137	265	268	146	146	274	280	397	400	123	126	279	350
LalRC212	Wine	121	121	275	275	449	452	120	120	256	262	146	150	316	316	380	380	126	126	311	358
LalRHST	Wine	115	127	293	293	446	446	137	159	253	253	146	156	253	253	409	409	123	123	320	326
LalS6U	Wine	124	124	291	291	434	434	139	139	297	297	139	139	295	295	400	400	123	123	291	291
LalT73	Wine	95	95	287	297	446	446	205	225	259	259	146	153	274	295	394	397	126	128	273	273
LlBRG	Wine	121	124	289	293	449	452	137	137	265	265	146	153	253	274	394	397	123	123	279	279
LlCHP	Wine	115	115	276	289	422	434	124	132	310	310	139	146	268	316	388	483	126	126	305	311
LlRiberia	Wine	124	124	289	289	420	420	120	120	240	240	146	146	271	271	385	385	126	126	311	311
LQWhiskey	Spirits	124	124	271	293	402	446	120	157	262	349	139	139	268	280	385	422	126	126	279	279
M2	Wine	124	124	293	293	431	431	124	124	259	259	153	153	280	280	388	388	128	128	311	311
MJM02	Cider	121	121	295	295	446	446	166	166	259	362	139	153	304	304	403	406	114	126	344	344
NT50	Wine	115	121	276	295	422	434	124	132	310	362	146	156	271	304	388	403	114	114	305	305
OeXt	Wine	115	121	276	289	422	434	124	132	310	310	139	146	316	316	388	483	126	126	311	311
PastChard	Wine	121	121	295	295	446	446	166	166	259	362	139	153	304	304	403	406	114	126	344	344
PastRed	Wine	115	115	291	291	449	449	151	151	250	250	139	139	250	250	413	413	123	123	288	288
PBlanc12V	Wine	121	121	291	293	446	446	153	193	250	259	146	146	292	323	385	394	126	126	279	279
PCuvee	Wine	115	121	276	289	422	434	124	132	310	310	139	146	268	316	388	483	126	126	305	311
PDM	Wine	115	121	276	289	422	434	124	132	310	310	139	146	268	316	388	483	126	126	305	311
Primeur	Wine	124	124	271	271	446	446	157	168	262	312	130	139	265	280	380	422	109	126	276	276
ProElif	Wine	115	121	276	289	422	434	124	132	310	310	139	146	268	316	388	483	126	126	311	311
PSuperT	Wine	121	121	291	297	446	449	139	151	253	253	139	139	236	250	406	406	126	126	326	326
RenAnd	Wine	121	121	275	275	449	449	122	122	256	256	150	150	274	274	409	409	126	126	279	279
RenViv	Wine	115	115	276	276	422	422	139	139	310	310	146	146	268	268	483	483	126	126	311	311
RSBeau	Wine	112	118	289	289	391	402	122	187	304	307	130	133	236	268	380	380	109	109	279	364
RSChamp	Wine	121	121	295	295	446	446	120	166	259	362	139	153	277	277	403	403	114	126	344	344
RSMont.M	Wine	115	121	291	291	446	455	120	120	253	253	139	153	271	271	385	409	126	126	344	344
S288C	Laboratory	121	121	295	295	443	443	157	157	240	240	130	130	292	292	406	406	131	131	294	294
S325.B	Wine	95	121	283	293	405	452	148	148	253	259	146	150	245	268	388	388	131	131	279	279
SaUS05.D	Beer	124	148	271	289	417	417	120	122	262	262	133	139	233	262	380	380	109	126	279	364
SaUS05.M	Beer	104	115	275	279	391	402	120	122	340	340	124	124	233	259	380	380	103	103	270	361
SauvL3	Wine	115	121	281	293	446	449	122	137	253	262	139	146	295	298	385	403	109	109	279	279
Sb33	Beer	112	124	271	289	391	402	122	189	256	304	130	133	236	265	380	406	109	109	279	364
SbWB06	Beer	121	139	291	293	449	449	139	139	271	271	130	143	253	289	347	400	109	109	372	372
SC22	Wine	115	121	291	291	446	455	120	159	253	253	139	153	271	271	385	409	126	126	344	344
SCMDC	Wine	115	121	276	289	422	434	124	132	310	310	139	146	268	316	388	483	126	126	305	311
SoGVS107	Wine	124	124	293	293	452	452	132	132	265	265	146	146	239	239	394	394	126	126	326	326
SoHD135	Wine	109	121	295	304	417	446	153	166	259	259	139	143	289	304	391	406	114	126	296	344
SoHDS62	Wine	109	121	295	304	402	417	143	166	259	304	153	153	289	304	391	403	126	126	296	344
SSHeat	Spirits	121	121	293	295	414	414	120	120	349	349	130	130	283	283	380	380	141	141	344	344
StGeo	Wine	124	124	271	271	446	446	157	157	262	262	130	139	265	280	380	422	109	126	276	276
Uva228	Wine	115	115	293	293	425	434	122	137	253	253	146	146	274	307	400	400	126	126	279	279
UVA43	Wine	121	127	276	276	446	449	132	170	304	356	139	153	248	271	382	382	114	114	276	323
UvaBC	Wine	121	121	295	295	446	446	120	166	259	362	139	153	304	304	403	406	114	126	344	344
UvaCEG	Wine	121	121	291	291	434	449	139	141	262	262	139	146	268	277	385	403	123	123	320	320
UvaGHM	Wine	121	121	293	293	393	446	120	139	259	262	150	150	295	304	409	409	126	126	259	259
UvaHPS	Wine	121	121	275	275	449	449	122	122	256	256	150	150	274	274	380	380	126	126	279	279
UvaPDM	Wine	115	121	276	289	422	434	124	132	310	310	139	146	268	316	388	483	126	126	305	311
UvaSVG	Wine	136	136	295	295	446	446	141	141	256	256	146	146	245	245	403	403	126	126	311	311
UvaVRB.D	Wine	121	121	291	291	437	437	159	159	253	253	156	159	253	253	388	388	126	126	279	279
UvaVRB.M	Wine	121	121	291	291	437	437	159	159	253	253	159	159	253	253	388	388	126	126	279	279
V1116	Wine	124	124	291	293	417	425	122	153	259	259	150	153	326	326	400	400	123	123	279	279
VHBV7	Wine	124	124	271	271	446	446	157	168	262	312	130	130	265	280	380	422	109	126	276	276
VHCL3	Wine	115	121	276	289	422	434	124	132	310	310	139	146	268	316	388	483	126	126	305	311
VHCR51	Wine	124	124	271	271	446	446	157	168	262	313	130	139	265	280	380	422	109	126	276	276
VHSN9	Wine	115	121	276	289	422	434	124	132	310	310	139	146	268	316	388	483	126	126	305	311
VkPort	Wine	121	121	295	297	405	452	139	151	262	262	139	146	245	245	444	444	128	128	279	279
VR44	Wine	115	121	276	289	422	434	124	132	307	310	139	146	268	316	388	483	126	126	305	305
Vt3001	Wine	115	121	291	295	425	446	139	139	256	256	146	150	250	298	385	388	126	126	279	279
VtElixir	Wine	115	124	289	293	422	446	120	122	253	262	146	153	268	280	385	388	109	126	311	323
VtM83	Wine	121	121	289	289	452	452	141	141	262	262	146	146	274	274	385	385	126	126	279	279
VtMT	Wine	121	121	276	276	452	452	122	122	265	265	150	150	301	301	397	397	126	126	279	279
VtQuartz	Wine	115	115	276	289	422	434	124	132	310	310	146	146	268	316	388	483	126	126	311	311
VtSyrah	Wine	121	124	276	291	393	452	122	161	250	265	146	150	274	323	400	400	109	126	279	279
Weiss	Wine	124	124	271	293	402	446	120	157	262	349	139	139	268	280	385	422	126	126	279	279
WilSel	Wine	115	124	276	276	446	449	132	168	301	310	139	139	271	280	382	385	114	114	285	369
Xevol	Wine	115	124	289	289	422	446	120	122	253	262	139	153	280	307	385	400	109	126	311	323
Y12632	Beer	124	124	271	271	446	446	157	168	262	262	130	139	265	280	380	422	109	126	276	276
ZfF15	Wine	124	124	291	291	437	437	146	146	259	259	153	153	280	280	385	385	126	126	323	323
ZfF83.D	Wine	124	124	289	293	446	446	120	143	250	250	143	153	274	274	385	385	109	123	323	323
ZfF83.M	Wine	115	124	289	293	446	446	120	143	250	262	143	153	274	280	385	385	109	123	323	347
ZfFX10	Wine	121	121	276	276	446	446	120	120	259	259	139	139	274	274	403	403	126	126	323	323
ZfSpark	Wine	121	121	276	276	446	446	120	120	259	259	139	139	274	274	403	403	126	126	323	323
ZfVL1.A	Wine	115	121	293	297	446	449	122	137	253	262	139	153	283	298	403	403	126	126	291	291
ZfVL1.B	Wine	115	115	293	297	446	449	122	137	253	262	139	153	283	298	403	403	126	126	291	291
ZfVL1.C	Wine	115	115	297	297	446	449	122	137	253	262	139	153	283	298	403	403	126	126	291	291
ZfVL2.A	Wine	115	124	293	293	402	417	122	153	253	259	153	153	298	326	400	403	123	123	279	291
ZfVL2.B	Wine	115	124	293	297	417	446	122	153	253	259	153	153	298	326	400	403	123	126	279	291
ZfVL2.C	Wine	115	124	293	297	417	446	122	153	253	259	150	153	298	326	400	403	126	126	279	291
ZfVL3.A	Wine	115	121	281	293	446	449	122	137	253	262	139	146	295	298	385	403	109	126	279	279
ZfX16	Wine	115	121	293	295	417	425	120	137	259	262	139	153	283	304	403	403	123	126	279	291
ZfX5	Wine	115	115	281	293	422	449	124	137	253	262	139	146	298	307	400	403	126	126	279	311

## Sheet: Notes
A, B, C: donotes multiple genotypes isolated from same commercial strain package (4 strains)
D,M: Same strain sourced from different labs has multiple genotypes
